# Supplementary material
Source: publisher figshare collection journal article supplement (https://acs.figshare.com/ndownloader/files/5727552)
Supplement: Supplementary file 1 [file 5727552]

**Supporting Information:** The Raman spectra of has 3 features below  $2000\text{ cm}^{-1}$ , the disorder induced D bands, the graphite like G bands related to the  $E_{2g2}$  graphite mode, and the D' bands which is also disorder induced and related to the maximum of the graphite 2D phonon density of states<sup>20</sup>. Normally, the G band can be decomposed into two close modes for the vibrations along the nanotubes axis and in circumferential direction<sup>21</sup>, but here we will consider it as only one band since we have not been able to observe this decomposition clearly. At higher frequencies than  $2000\text{ cm}^{-1}$ , overtones of these bands are seen. 2xD, D+G and 2xG are the overtones of D/D, D/G and G/G modes respectively.

**Table 1. Experimentally measured Raman modes of pure  $^{12}\text{C}$  and pure  $^{13}\text{C}$  multi-walled carbon nanotube arrays.**

| Raman modes <sup>22</sup>                  | D     | G     | D'    | <sup>a</sup> | 2xD   | D+G   | 2xG   |
|--------------------------------------------|-------|-------|-------|--------------|-------|-------|-------|
| $^{13}\text{C}$ MWNT ( $\text{cm}^{-1}$ )  | 1298  | 1526  | 1558  | 2345         | 2590  | 2833  | 3099  |
| $^{12}\text{C}$ MWNT ( $\text{cm}^{-1}$ )  | 1350  | 1585  | 1620  | 2452         | 2700  | 2947  | 3232  |
| Ratio of $^{13}\text{C} / ^{12}\text{C}^b$ | 0.961 | 0.963 | 0.962 | 0.956        | 0.959 | 0.961 | 0.959 |

<sup>a</sup> This band has no explicit name in the graphitic Raman spectrum.

<sup>b</sup> The ratio of the Raman frequencies of  $^{13}\text{C}$  nanotubes over the corresponding frequencies of  $^{12}\text{C}$  nanotubes.
